# Supplementary material for: Assessment of an optimized manufacturing process for inactivated quadrivalent influenza vaccine: a phase III, randomized, double-blind, safety and immunogenicity study in children and adults
Source: Springer Nature journal article supplement (doi:10.1186/s12879-018-3079-8), 2018-04-18
Supplement: MOESM1 [file 15703236]

Assessment of an optimized manufacturing process for inactivated quadrivalent influenza vaccine: a Phase III, randomized, double-blind, safety and immunogenicity study in children and adults

### Additional file 1

Solicited oculo-respiratory syndrome-like symptoms within the 3-day post vaccination period in infants (6–35 months), children (3–17 years), and adults (18–49 years) (total vaccinated cohort)

|                             |          |         | <b>IIV4-I</b>          | <b>IIV4</b>            |
|-----------------------------|----------|---------|------------------------|------------------------|
|                             |          |         | <b>Infants: N=462</b>  | <b>Infants: N=470</b>  |
|                             |          |         | <b>Children: N=410</b> | <b>Children: N=410</b> |
|                             |          |         | <b>Adults: N=60</b>    | <b>Adults: N=59</b>    |
|                             |          |         | <b>% (95% CI)</b>      | <b>% (95% CI)</b>      |
| <b>Chest tightness</b>      | Infants  | All     | 2.2 (1.0, 3.9)         | 1.1 (0.3, 2.5)         |
|                             |          | Grade 3 | 0.0 (0.0, 0.8)         | 0.4 (0.1, 1.5)         |
|                             | Children | All     | 0.5 (0.1, 1.8)         | 1.5 (0.5, 3.2)         |
|                             |          | Grade 3 | 0.0 (0.0, 0.9)         | 0.0 (0.0, 0.9)         |
|                             | Adults   | All     | 0.0 (0.0, 6.0)         | 0.0 (0.0, 6.1)         |
|                             |          | Grade 3 | 0.0 (0.0, 6.0)         | 0.0 (0.0, 6.1)         |
| <b>Cough</b>                | Infants  | All     | 15.8 (12.6, 19.5)      | 18.1 (14.7, 21.9)      |
|                             |          | Grade 3 | 1.7 (0.8, 3.4)         | 1.3 (0.5, 2.8)         |
|                             | Children | All     | 9.5 (6.9, 12.8)        | 9.5 (6.9, 12.8)        |
|                             |          | Grade 3 | 0.5 (0.1, 1.8)         | 0.7 (0.2, 2.1)         |
|                             | Adults   | All     | 5.0 (1.0, 13.9)        | 3.4 (0.4, 11.7)        |
|                             |          | Grade 3 | 0.0 (0.0, 6.0)         | 0.0 (0.0, 6.1)         |
| <b>Difficulty breathing</b> | Infants  | All     | 6.7 (4.6, 9.4)         | 5.3 (3.5, 7.8)         |
|                             |          | Grade 3 | 0.4 (0.1, 1.6)         | 0.6 (0.1, 1.9)         |
|                             | Children | All     | 1.2 (0.4, 2.8)         | 3.2 (1.7, 5.4)         |
|                             |          | Grade 3 | 0.0 (0.0, 0.9)         | 0.0 (0.0, 0.9)         |
|                             | Adults   | All     | 0.0 (0.0, 6.0)         | 0.0 (0.0, 6.1)         |
|                             |          | Grade 3 | 0.0 (0.0, 6.0)         | 0.0 (0.0, 6.1)         |
| <b>Hoarseness</b>           | Infants  | All     | 5.0 (3.2, 7.4)         | 3.6 (2.1, 5.7)         |
|                             |          | Grade 3 | 0.0 (0.0, 0.8)         | 0.2 (0.0, 1.2)         |
|                             | Children | All     | 2.7 (1.3, 4.7)         | 3.7 (2.1, 6.0)         |
|                             |          | Grade 3 | 0.0 (0.0, 0.9)         | 0.0 (0.0, 0.9)         |

|                              |          |         |                 |                 |
|------------------------------|----------|---------|-----------------|-----------------|
|                              | Adults   | All     | 1.7 (0.0, 8.9)  | 1.7 (0.0, 9.1)  |
|                              |          | Grade 3 | 0.0 (0.0, 6.0)  | 0.0 (0.0, 6.1)  |
| <b>Red eyes</b>              | Infants  | All     | 3.9 (2.3, 6.1)  | 4.0 (2.5, 6.2)  |
|                              |          | Grade 3 | 0.0 (0.0, 0.8)  | 0.0 (0.0, 0.8)  |
|                              | Children | All     | 3.4 (1.9, 5.7)  | 3.2 (1.7, 5.4)  |
|                              |          | Grade 3 | 0.0 (0.0, 0.9)  | 0.2 (0.0, 1.4)  |
|                              | Adults   | All     | 1.7 (0.0, 8.9)  | 1.7 (0.0, 9.1)  |
|                              |          | Grade 3 | 0.0 (0.0, 6.0)  | 0.0 (0.0, 6.1)  |
| <b>Sore throat</b>           | Infants  | All     | 2.6 (1.3, 4.5)  | 3.6 (2.1, 5.7)  |
|                              |          | Grade 3 | 0.2 (0.0, 1.2)  | 0.2 (0.0, 1.2)  |
|                              | Children | All     | 3.7 (2.1, 6.0)  | 5.1 (3.2, 7.7)  |
|                              |          | Grade 3 | 0.2 (0.0, 1.4)  | 0.2 (0.0, 1.4)  |
|                              | Adults   | All     | 6.7 (1.8, 16.2) | 3.4 (0.4, 11.7) |
|                              |          | Grade 3 | 0.0 (0.0, 6.0)  | 0.0 (0.0, 6.1)  |
| <b>Swallowing difficulty</b> | Infants  | All     | 1.7 (0.8, 3.4)  | 2.6 (1.3, 4.4)  |
|                              |          | Grade 3 | 0.4 (0.1, 1.6)  | 0.2 (0.0, 1.2)  |
|                              | Children | All     | 1.5 (0.5, 3.2)  | 1.7 (0.7, 3.5)  |
|                              |          | Grade 3 | 0.0 (0.0, 0.9)  | 0.2 (0.0, 1.4)  |
|                              | Adults   | All     | 5.0 (1.0, 13.9) | 1.7 (0.0, 9.1)  |
|                              |          | Grade 3 | 0.0 (0.0, 6.0)  | 0.0 (0.0, 6.1)  |
| <b>Swelling of the face</b>  | Infants  | All     | 1.9 (0.9, 3.7)  | 1.5 (0.6, 3.0)  |
|                              |          | Grade 3 | 0.0 (0.0, 0.8)  | 0.0 (0.0, 0.8)  |
|                              | Children | All     | 0.7 (0.2, 2.1)  | 0.7 (0.2, 2.1)  |
|                              |          | Grade 3 | 0.0 (0.0, 0.9)  | 0.0 (0.0, 0.9)  |
|                              | Adults   | All     | 0.0 (0.0, 6.0)  | 0.0 (0.0, 6.1)  |
|                              |          | Grade 3 | 0.0 (0.0, 6.0)  | 0.0 (0.0, 6.1)  |
| <b>Wheezing</b>              | Infants  | All     | 4.1 (2.5, 6.3)  | 5.5 (3.6, 8.0)  |
|                              |          | Grade 3 | 0.9 (0.2, 2.2)  | 0.4 (0.1, 1.5)  |
|                              | Children | All     | 0.2 (0.0, 1.4)  | 1.7 (0.7, 3.5)  |
|                              |          | Grade 3 | 0.0 (0.0, 0.9)  | 0.0 (0.0, 0.9)  |
|                              | Adults   | All     | 0.0 (0.0, 6.0)  | 0.0 (0.0, 6.1)  |
|                              |          | Grade 3 | 0.0 (0.0, 6.0)  | 0.0 (0.0, 6.1)  |

IIV4-I, quadrivalent inactivated influenza vaccine manufacturing by investigational process; IIV4, licensed quadrivalent inactivated influenza vaccine; N, number of subjects with  $\geq 1$  vaccine dose and who returned the diary cards
