# Supplementary material for: Assessment of an optimized manufacturing process for inactivated quadrivalent influenza vaccine: a phase III, randomized, double-blind, safety and immunogenicity study in children and adults
Source: Springer Nature journal article supplement (doi:10.1186/s12879-018-3079-8), 2018-04-18
Supplement: MOESM2 [file 15703236]

Assessment of an optimized manufacturing process for inactivated quadrivalent influenza vaccine: a Phase III, randomized, double-blind, safety and immunogenicity study in children and adults

## Additional file 2

Serious adverse events in infants (6–35 months), children (3–17 years), and adults (18–49 years) during the entire study† (total vaccinated cohort)

| <b>System organ class</b><br><b>Preferred Term</b>                                                                                                            | <b>Adults</b><br><b>IIV4-I</b><br><b>N=60</b><br><b>n; % (95% CI)</b>            | <b>Adults</b><br><b>IIV4</b><br><b>N=60</b><br><b>n; % (95% CI)</b>              |
|---------------------------------------------------------------------------------------------------------------------------------------------------------------|----------------------------------------------------------------------------------|----------------------------------------------------------------------------------|
| At least one symptom                                                                                                                                          | 1; 1.7 (0.0, 8.9)                                                                | 1; 1.7 (0.0, 8.9)                                                                |
| Injury, poisoning and procedural complications (10022117)<br>Post procedural inflammation (10063101)                                                          | 0; 0.0 (0.0, 6.0)                                                                | 1; 1.7 (0.0, 8.9)                                                                |
| Musculoskeletal and connective tissue disorders (10028395)<br>Back pain (10003988)                                                                            | 1; 1.7 (0.0, 8.9)                                                                | 0; 0.0 (0.0, 6.0)                                                                |
|                                                                                                                                                               | <b>Children</b><br><b>IIV4-I</b><br><b>N=410</b><br><b>n; % (95% CI)</b>         | <b>Children</b><br><b>IIV4</b><br><b>N=411</b><br><b>n; % (95% CI)</b>           |
| At least one symptom                                                                                                                                          | 1; 0.2 (0.0, 1.4)                                                                | 0; 0.0 (0.0, 0.9)                                                                |
| Infections and infestations (10021881)<br>Meningitis viral (10027260)                                                                                         | 1; 0.2 (0.0, 1.4)                                                                | 0; 0.0 (0.0, 0.9)                                                                |
|                                                                                                                                                               | <b>Infants</b><br><b>IIV4-I</b><br><b>N=466</b><br><b>n; % (95% CI)</b>          | <b>Infants</b><br><b>IIV4</b><br><b>N=474</b><br><b>n; % (95% CI)</b>            |
| At least one symptom                                                                                                                                          | 7; 1.5 (0.6, 3.1)                                                                | 11; 2.3 (1.2, 4.1)                                                               |
| Infections and infestations (10021881)<br>Adenovirus infection (10060931)<br>Bronchiolitis (10006448)<br>Bronchitis (10006451)<br>Bronchopneumonia (10006469) | 0; 0.0 (0.0, 0.8)<br>0; 0.0 (0.0, 0.8)<br>2; 0.4 (0.1, 1.5)<br>1; 0.2 (0.0, 1.2) | 1; 0.2 (0.0, 1.2)<br>2; 0.4 (0.1, 1.5)<br>2; 0.4 (0.1, 1.5)<br>0; 0.0 (0.0, 0.8) |

|                                                      |                   |                   |
|------------------------------------------------------|-------------------|-------------------|
| Epstein-barr virus infection (10015108)              | 0; 0.0 (0.0, 0.8) | 1; 0.2 (0.0, 1.2) |
| Gastroenteritis (10017888)                           | 3; 0.6 (0.1, 1.9) | 2; 0.4 (0.1, 1.5) |
| Haemophilus infection (10061190)                     | 0; 0.0 (0.0, 0.8) | 1; 0.2 (0.0, 1.2) |
| Otitis media (10033078)                              | 0; 0.0 (0.0, 0.8) | 1; 0.2 (0.0, 1.2) |
| Pneumonia respiratory syncytial viral (10035732)     | 1; 0.2 (0.0, 1.2) | 0; 0.0 (0.0, 0.8) |
| Pseudocroup (10050187)                               | 0; 0.0 (0.0, 0.8) | 1; 0.2 (0.0, 1.2) |
| Respiratory syncytial virus bronchiolitis (10038718) | 0; 0.0 (0.0, 0.8) | 1; 0.2 (0.0, 1.2) |
| Upper respiratory tract infection (10046306)         | 1; 0.2 (0.0, 1.2) | 0; 0.0 (0.0, 0.8) |
| Viral infection (10047461)                           | 0; 0.0 (0.0, 0.8) | 1; 0.2 (0.0, 1.2) |
| Metabolism and nutrition disorders (10027433)        |                   |                   |
| Dehydration (10012174)                               | 1; 0.2 (0.0, 1.2) | 0; 0.0 (0.0, 0.8) |

IIV4-I, quadrivalent inactivated influenza vaccine manufacturing by investigational process; IIV4, licensed quadrivalent inactivated influenza vaccine; SAE, serious adverse event, CI, confidence interval; †including the allowed visit interval of up to 23 days post-vaccination for the adults and up to 42 days post-last vaccination for the children; N, number of subjects with  $\geq 1$  vaccine dose, n, number of subjects reporting the event
