# Supplementary material for: Assessment of an optimized manufacturing process for inactivated quadrivalent influenza vaccine: a phase III, randomized, double-blind, safety and immunogenicity study in children and adults
Source: Springer Nature journal article supplement (doi:10.1186/s12879-018-3079-8), 2018-04-18
Supplement: MOESM3 [file 15703236]

Assessment of an optimized manufacturing process for inactivated quadrivalent influenza vaccine: a Phase III, randomized, double-blind, safety and immunogenicity study in children and adults

### Additional file 3

Medically-attended adverse events in and adults (18–49 years), children (3–17 years), and infants (6–35 months), during the entire study† (total vaccinated cohort)

| <b>System Organ Class<br/>Preferred Term</b>                                                                                                                                                             | <b>Adults<br/>IIV4-I<br/>N=466<br/>n; % (95% CI)</b>                                                                       | <b>Adults<br/>IIV4<br/>N=474<br/>n; % (95% CI)</b>                                                                           |
|----------------------------------------------------------------------------------------------------------------------------------------------------------------------------------------------------------|----------------------------------------------------------------------------------------------------------------------------|------------------------------------------------------------------------------------------------------------------------------|
| At least one symptom                                                                                                                                                                                     | 9; 15.0 (7.1, 26.6)                                                                                                        | 8; 13.3 (5.9, 24.6)                                                                                                          |
| Immune system disorders (10021428)<br>Allergy to arthropod bite (10058285)<br>Hypersensitivity (10020751)                                                                                                | 0; 0.0 (0.0, 6.0)<br>1; 1.7 (0.0, 8.9)                                                                                     | 1; 1.7 (0.0, 8.9)<br>0; 0.0 (0.0, 6.0)                                                                                       |
| Infections and infestations (10021881)<br>Bronchitis (10006451)<br>Gastroenteritis (10017888)<br>Nasopharyngitis (10028810)<br>Otitis media (10033078)<br>Sinusitis (10040753)<br>Tonsillitis (10044008) | 1; 1.7 (0.0, 8.9)<br>1; 1.7 (0.0, 8.9)<br>0; 0.0 (0.0, 6.0)<br>1; 1.7 (0.0, 8.9)<br>0; 0.0 (0.0, 6.0)<br>1; 1.7 (0.0, 8.9) | 1; 1.7 (0.0, 8.9)<br>2; 3.3 (0.4, 11.5)<br>2; 3.3 (0.4, 11.5)<br>0; 0.0 (0.0, 6.0)<br>1; 1.7 (0.0, 8.9)<br>0; 0.0 (0.0, 6.0) |
| Injury, poisoning and procedural complications (10022117)<br>Arthropod bite (10003399)<br>Joint injury (10060820)<br>Post procedural inflammation (10063101)                                             | 0; 0.0 (0.0, 6.0)<br>1; 1.7 (0.0, 8.9)<br>0; 0.0 (0.0, 6.0)                                                                | 1; 1.7 (0.0, 8.9)<br>0; 0.0 (0.0, 6.0)<br>1; 1.7 (0.0, 8.9)                                                                  |
| Musculoskeletal and connective tissue disorders (10028395)<br>Back pain (10003988)<br>Intervertebral disc protrusion (10050296)<br>Spinal disorder (10061368)                                            | 1; 1.7 (0.0, 8.9)<br>1; 1.7 (0.0, 8.9)<br>1; 1.7 (0.0, 8.9)                                                                | 1; 1.7 (0.0, 8.9)<br>0; 0.0 (0.0, 6.0)<br>0; 0.0 (0.0, 6.0)                                                                  |
|                                                                                                                                                                                                          | <b>Children<br/>IIV4-I<br/>N=466<br/>n; % (95% CI)</b>                                                                     | <b>Children<br/>IIV4<br/>N=474<br/>n; % (95% CI)</b>                                                                         |
| At least one symptom                                                                                                                                                                                     | 235; 50.4 (45.8, 55.1)                                                                                                     | 252; 53.2 (48.6, 57.7)                                                                                                       |

|                                                                                                                                                                                                                                                                                                                                                                                                                                                                                                                                                                                                                                                      |                                                                                                                                                                                                                                                                                                                                                                                                                                      |                                                                                                                                                                                                                                                                                                                                                                                             |
|------------------------------------------------------------------------------------------------------------------------------------------------------------------------------------------------------------------------------------------------------------------------------------------------------------------------------------------------------------------------------------------------------------------------------------------------------------------------------------------------------------------------------------------------------------------------------------------------------------------------------------------------------|--------------------------------------------------------------------------------------------------------------------------------------------------------------------------------------------------------------------------------------------------------------------------------------------------------------------------------------------------------------------------------------------------------------------------------------|---------------------------------------------------------------------------------------------------------------------------------------------------------------------------------------------------------------------------------------------------------------------------------------------------------------------------------------------------------------------------------------------|
| Blood and lymphatic system disorders (10005329)<br>Lymphadenitis (10025188)                                                                                                                                                                                                                                                                                                                                                                                                                                                                                                                                                                          | 1; 0.2 (0.0, 1.2)                                                                                                                                                                                                                                                                                                                                                                                                                    | 0; 0.0 (0.0, 0.8)                                                                                                                                                                                                                                                                                                                                                                           |
| Congenital, familial and genetic disorders (10010331)<br>Cryptorchism (10011498)                                                                                                                                                                                                                                                                                                                                                                                                                                                                                                                                                                     | 0; 0.0 (0.0, 0.8)                                                                                                                                                                                                                                                                                                                                                                                                                    | 1; 0.2 (0.0, 1.2)                                                                                                                                                                                                                                                                                                                                                                           |
| Ear and labyrinth disorders (10013993)<br>Ear pain (10014020)<br>Middle ear inflammation (10065838)                                                                                                                                                                                                                                                                                                                                                                                                                                                                                                                                                  | 1; 0.2 (0.0, 1.2)<br>1; 0.2 (0.0, 1.2)                                                                                                                                                                                                                                                                                                                                                                                               | 1; 0.2 (0.0, 1.2)<br>0; 0.0 (0.0, 0.8)                                                                                                                                                                                                                                                                                                                                                      |
| Eye disorders (10015919)<br>Conjunctivitis allergic (10010744)                                                                                                                                                                                                                                                                                                                                                                                                                                                                                                                                                                                       | 1; 0.2 (0.0, 1.2)                                                                                                                                                                                                                                                                                                                                                                                                                    | 0; 0.0 (0.0, 0.8)                                                                                                                                                                                                                                                                                                                                                                           |
| Gastrointestinal disorders (10017947)<br>Anal fissure (10002153)<br>Apthous stomatitis (10002958)<br>Constipation (10010774)<br>Diarrhoea (10012735)<br>Enteritis (10014866)<br>Inguinal hernia (10022016)<br>Stomatitis (10042128)<br>Teething (10043183)<br>Tooth disorder (10044034)<br>Toothache (10044055)<br>Umbilical hernia (10045458)<br>Vomiting (10047700)                                                                                                                                                                                                                                                                                | 0; 0.0 (0.0, 0.8)<br>0; 0.0 (0.0, 0.8)<br>1; 0.2 (0.0, 1.2)<br>3; 0.6 (0.1, 1.9)<br>2; 0.4 (0.1, 1.5)<br>0; 0.0 (0.0, 0.8)<br>2; 0.4 (0.1, 1.5)<br>1; 0.2 (0.0, 1.2)<br>1; 0.2 (0.0, 1.2)<br>1; 0.2 (0.0, 1.2)<br>1; 0.2 (0.0, 1.2)<br>1; 0.2 (0.0, 1.2)<br>4; 0.9 (0.2, 2.2)                                                                                                                                                        | 1; 0.2 (0.0, 1.2)<br>2; 0.4 (0.1, 1.5)<br>1; 0.2 (0.0, 1.2)<br>9; 1.9 (0.9, 3.6)<br>2; 0.4 (0.1, 1.5)<br>1; 0.2 (0.0, 1.2)<br>1; 0.2 (0.0, 1.2)<br>1; 0.2 (0.0, 1.2)<br>2; 0.4 (0.1, 1.5)<br>3; 0.6 (0.1, 1.8)<br>0; 0.0 (0.0, 0.8)<br>6; 1.3 (0.5, 2.7)                                                                                                                                    |
| General disorders and administration site conditions (10018065)<br>Inflammation (10061218)<br>Pain (10033371)<br>Pyrexia (10037660)                                                                                                                                                                                                                                                                                                                                                                                                                                                                                                                  | 1; 0.2 (0.0, 1.2)<br>1; 0.2 (0.0, 1.2)<br>21; 4.5 (2.8, 6.8)                                                                                                                                                                                                                                                                                                                                                                         | 0; 0.0 (0.0, 0.8)<br>0; 0.0 (0.0, 0.8)<br>20; 4.2 (2.6, 6.4)                                                                                                                                                                                                                                                                                                                                |
| Immune system disorders (10021428)<br>Food allergy (10016946)<br>Hypersensitivity (10020751)                                                                                                                                                                                                                                                                                                                                                                                                                                                                                                                                                         | 0; 0.0 (0.0, 0.8)<br>0; 0.0 (0.0, 0.8)                                                                                                                                                                                                                                                                                                                                                                                               | 1; 0.2 (0.0, 1.2)<br>1; 0.2 (0.0, 1.2)                                                                                                                                                                                                                                                                                                                                                      |
| Infections and infestations (10021881)<br>Acarodermatitis (10063409)<br>Acute tonsillitis (10001093)<br>Adenovirus infection (10060931)<br>Bronchiolitis (10006448)<br>Bronchitis (10006451)<br>Bronchitis viral (10053160)<br>Bronchopneumonia (10006469)<br>Candida infection (10074170)<br>Candida nappy rash (10007135)<br>Conjunctivitis (10010741)<br>Croup infectious (10011416)<br>Dysentery (10051402)<br>Ear infection (10014011)<br>Enterobiasis (10014881)<br>Epstein-barr virus infection (10015108)<br>Exanthema subitum (10015586)<br>Febrile infection (10051998)<br>Fungal infection (10017533)<br>Fungal skin infection (10017543) | 1; 0.2 (0.0, 1.2)<br>0; 0.0 (0.0, 0.8)<br>0; 0.0 (0.0, 0.8)<br>7; 1.5 (0.6, 3.1)<br>46; 9.9 (7.3, 12.9)<br>0; 0.0 (0.0, 0.8)<br>6; 1.3 (0.5, 2.8)<br>2; 0.4 (0.1, 1.5)<br>0; 0.0 (0.0, 0.8)<br>17; 3.6 (2.1, 5.8)<br>2; 0.4 (0.1, 1.5)<br>0; 0.0 (0.0, 0.8)<br>11; 2.4 (1.2, 4.2)<br>0; 0.0 (0.0, 0.8)<br>0; 0.0 (0.0, 0.8)<br>1; 0.2 (0.0, 1.2)<br>1; 0.2 (0.0, 1.2)<br>2; 0.4 (0.1, 1.5)<br>2; 0.4 (0.1, 1.5)<br>2; 0.4 (0.1, 1.5) | 0; 0.0 (0.0, 0.8)<br>2; 0.4 (0.1, 1.5)<br>1; 0.2 (0.0, 1.2)<br>9; 1.9 (0.9, 3.6)<br>57; 12.0 (9.2, 15.3)<br>1; 0.2 (0.0, 1.2)<br>1; 0.2 (0.0, 1.2)<br>0; 0.0 (0.0, 0.8)<br>1; 0.2 (0.0, 1.2)<br>16; 3.4 (1.9, 5.4)<br>0; 0.0 (0.0, 0.8)<br>2; 0.4 (0.1, 1.5)<br>15; 3.2 (1.8, 5.2)<br>1; 0.2 (0.0, 1.2)<br>1; 0.2 (0.0, 1.2)<br>0; 0.0 (0.0, 0.8)<br>0; 0.0 (0.0, 0.8)<br>1; 0.2 (0.0, 1.2) |

|                                                           |                       |                       |
|-----------------------------------------------------------|-----------------------|-----------------------|
| Gastroenteritis (10017888)                                | 29; 6.2 (4.2, 8.8)    | 34; 7.2 (5.0, 9.9)    |
| Gastroenteritis viral (10017918)                          | 1; 0.2 (0.0, 1.2)     | 0; 0.0 (0.0, 0.8)     |
| Gianotti-crostiti syndrome (10053842)                     | 0; 0.0 (0.0, 0.8)     | 1; 0.2 (0.0, 1.2)     |
| Giardiasis (10018262)                                     | 1; 0.2 (0.0, 1.2)     | 0; 0.0 (0.0, 0.8)     |
| Gingivitis (10018292)                                     | 0; 0.0 (0.0, 0.8)     | 1; 0.2 (0.0, 1.2)     |
| Haemophilus infection (10061190)                          | 0; 0.0 (0.0, 0.8)     | 1; 0.2 (0.0, 1.2)     |
| Hand-foot-and-mouth disease (10019113)                    | 3; 0.6 (0.1, 1.9)     | 5; 1.1 (0.3, 2.4)     |
| Herpangina (10019936)                                     | 4; 0.9 (0.2, 2.2)     | 4; 0.8 (0.2, 2.1)     |
| Herpes virus infection (10019973)                         | 1; 0.2 (0.0, 1.2)     | 1; 0.2 (0.0, 1.2)     |
| Hordeolum (10020377)                                      | 1; 0.2 (0.0, 1.2)     | 1; 0.2 (0.0, 1.2)     |
| Impetigo (10021531)                                       | 1; 0.2 (0.0, 1.2)     | 1; 0.2 (0.0, 1.2)     |
| Laryngitis (10023874)                                     | 3; 0.6 (0.1, 1.9)     | 8; 1.7 (0.7, 3.3)     |
| Lice infestation (10024424)                               | 1; 0.2 (0.0, 1.2)     | 0; 0.0 (0.0, 0.8)     |
| Lower respiratory tract infection (10024968)              | 5; 1.1 (0.3, 2.5)     | 1; 0.2 (0.0, 1.2)     |
| Molluscum contagiosum (10027807)                          | 0; 0.0 (0.0, 0.8)     | 1; 0.2 (0.0, 1.2)     |
| Myringitis (10061302)                                     | 0; 0.0 (0.0, 0.8)     | 1; 0.2 (0.0, 1.2)     |
| Nasopharyngitis (10028810)                                | 27; 5.8 (3.9, 8.3)    | 30; 6.3 (4.3, 8.9)    |
| Oral candidiasis (10030963)                               | 1; 0.2 (0.0, 1.2)     | 2; 0.4 (0.1, 1.5)     |
| Oral fungal infection (10061324)                          | 0; 0.0 (0.0, 0.8)     | 1; 0.2 (0.0, 1.2)     |
| Oral herpes (10067152)                                    | 2; 0.4 (0.1, 1.5)     | 1; 0.2 (0.0, 1.2)     |
| Otitis externa (10033072)                                 | 0; 0.0 (0.0, 0.8)     | 1; 0.2 (0.0, 1.2)     |
| Otitis media (10033078)                                   | 8; 1.7 (0.7, 3.4)     | 8; 1.7 (0.7, 3.3)     |
| Otitis media acute (10033079)                             | 19; 4.1 (2.5, 6.3)    | 14; 3.0 (1.6, 4.9)    |
| Pharyngitis (10034835)                                    | 13; 2.8 (1.5, 4.7)    | 7; 1.5 (0.6, 3.0)     |
| Pharyngotonsillitis (10049140)                            | 3; 0.6 (0.1, 1.9)     | 3; 0.6 (0.1, 1.8)     |
| Pneumonia (10035664)                                      | 3; 0.6 (0.1, 1.9)     | 4; 0.8 (0.2, 2.1)     |
| Pneumonia respiratory syncytial viral (10035732)          | 1; 0.2 (0.0, 1.2)     | 0; 0.0 (0.0, 0.8)     |
| Pseudocroup (10050187)                                    | 1; 0.2 (0.0, 1.2)     | 1; 0.2 (0.0, 1.2)     |
| Rash pustular (10037888)                                  | 1; 0.2 (0.0, 1.2)     | 0; 0.0 (0.0, 0.8)     |
| Respiratory syncytial virus bronchiolitis (10038718)      | 0; 0.0 (0.0, 0.8)     | 1; 0.2 (0.0, 1.2)     |
| Respiratory tract infection (10062352)                    | 6; 1.3 (0.5, 2.8)     | 7; 1.5 (0.6, 3.0)     |
| Respiratory tract infection viral (10062106)              | 2; 0.4 (0.1, 1.5)     | 5; 1.1 (0.3, 2.4)     |
| Rhinitis (10039083)                                       | 6; 1.3 (0.5, 2.8)     | 9; 1.9 (0.9, 3.6)     |
| Rhinotracheitis (10051497)                                | 3; 0.6 (0.1, 1.9)     | 5; 1.1 (0.3, 2.4)     |
| Roseola (10039222)                                        | 2; 0.4 (0.1, 1.5)     | 5; 1.1 (0.3, 2.4)     |
| Scarlet fever (10039587)                                  | 0; 0.0 (0.0, 0.8)     | 1; 0.2 (0.0, 1.2)     |
| Sinobronchitis (10048979)                                 | 0; 0.0 (0.0, 0.8)     | 1; 0.2 (0.0, 1.2)     |
| Sinusitis (10040753)                                      | 2; 0.4 (0.1, 1.5)     | 0; 0.0 (0.0, 0.8)     |
| Streptococcal infection (10061372)                        | 0; 0.0 (0.0, 0.8)     | 1; 0.2 (0.0, 1.2)     |
| Tonsillitis (10044008)                                    | 6; 1.3 (0.5, 2.8)     | 7; 1.5 (0.6, 3.0)     |
| Tracheitis (10044302)                                     | 6; 1.3 (0.5, 2.8)     | 8; 1.7 (0.7, 3.3)     |
| Upper respiratory tract infection (10046306)              | 60; 12.9 (10.0, 16.3) | 66; 13.9 (10.9, 17.4) |
| Urinary tract infection (10046571)                        | 2; 0.4 (0.1, 1.5)     | 2; 0.4 (0.1, 1.5)     |
| Varicella (10046980)                                      | 2; 0.4 (0.1, 1.5)     | 4; 0.8 (0.2, 2.1)     |
| Viral infection (10047461)                                | 10; 2.1 (1.0, 3.9)    | 15; 3.2 (1.8, 5.2)    |
| Viral rash (10047476)                                     | 2; 0.4 (0.1, 1.5)     | 2; 0.4 (0.1, 1.5)     |
| Viral tonsillitis (10047480)                              | 0; 0.0 (0.0, 0.8)     | 1; 0.2 (0.0, 1.2)     |
| Injury, poisoning and procedural complications (10022117) |                       |                       |
| Arthropod bite (10003399)                                 | 3; 0.6 (0.1, 1.9)     | 1; 0.2 (0.0, 1.2)     |
| Contusion (10050584)                                      | 0; 0.0 (0.0, 0.8)     | 1; 0.2 (0.0, 1.2)     |
| Face injury (10050392)                                    | 1; 0.2 (0.0, 1.2)     | 0; 0.0 (0.0, 0.8)     |
| Foreign body (10070245)                                   | 1; 0.2 (0.0, 1.2)     | 0; 0.0 (0.0, 0.8)     |
| Hair injury (10074924)                                    | 0; 0.0 (0.0, 0.8)     | 1; 0.2 (0.0, 1.2)     |
| Head injury (10019196)                                    | 1; 0.2 (0.0, 1.2)     | 1; 0.2 (0.0, 1.2)     |
| Injury (10022116)                                         | 0; 0.0 (0.0, 0.8)     | 1; 0.2 (0.0, 1.2)     |

|                                                                                                                                                                                                                                                                                                                                                                                                                   |                                                                                                                                                                                                                                                            |                                                                                                                                                                                                                                                           |
|-------------------------------------------------------------------------------------------------------------------------------------------------------------------------------------------------------------------------------------------------------------------------------------------------------------------------------------------------------------------------------------------------------------------|------------------------------------------------------------------------------------------------------------------------------------------------------------------------------------------------------------------------------------------------------------|-----------------------------------------------------------------------------------------------------------------------------------------------------------------------------------------------------------------------------------------------------------|
| Joint dislocation (10023204)<br>Limb injury (10061225)<br>Lip injury (10055082)<br>Thermal burn (10053615)<br>Traumatic haematoma (10044522)<br>Wound dehiscence (10048031)                                                                                                                                                                                                                                       | 0; 0.0 (0.0, 0.8)<br>1; 0.2 (0.0, 1.2)<br>1; 0.2 (0.0, 1.2)<br>2; 0.4 (0.1, 1.5)<br>1; 0.2 (0.0, 1.2)<br>0; 0.0 (0.0, 0.8)                                                                                                                                 | 1; 0.2 (0.0, 1.2)<br>0; 0.0 (0.0, 0.8)<br>0; 0.0 (0.0, 0.8)<br>0; 0.0 (0.0, 0.8)<br>0; 0.0 (0.0, 0.8)<br>1; 0.2 (0.0, 1.2)                                                                                                                                |
| Metabolism and nutrition disorders (10027433)<br>Dehydration (10012174)<br>Iron deficiency (10022970)<br>Lactose intolerance (10023681)<br>Weight gain poor (10047897)                                                                                                                                                                                                                                            | 1; 0.2 (0.0, 1.2)<br>1; 0.2 (0.0, 1.2)<br>1; 0.2 (0.0, 1.2)<br>0; 0.0 (0.0, 0.8)                                                                                                                                                                           | 0; 0.0 (0.0, 0.8)<br>0; 0.0 (0.0, 0.8)<br>0; 0.0 (0.0, 0.8)<br>1; 0.2 (0.0, 1.2)                                                                                                                                                                          |
| Musculoskeletal and connective tissue disorders (10028395)<br>Synovitis (10042868)                                                                                                                                                                                                                                                                                                                                | 1; 0.2 (0.0, 1.2)                                                                                                                                                                                                                                          | 1; 0.2 (0.0, 1.2)                                                                                                                                                                                                                                         |
| Neoplasms benign, malignant and unspecified (10029104)<br>Melanocytic naevus (10027145)                                                                                                                                                                                                                                                                                                                           | 0; 0.0 (0.0, 0.8)                                                                                                                                                                                                                                          | 1; 0.2 (0.0, 1.2)                                                                                                                                                                                                                                         |
| Nervous system disorders (10029205)<br>Febrile convulsion (10016284)                                                                                                                                                                                                                                                                                                                                              | 0; 0.0 (0.0, 0.8)                                                                                                                                                                                                                                          | 1; 0.2 (0.0, 1.2)                                                                                                                                                                                                                                         |
| Psychiatric disorders (10037175)<br>Bruxism (10006514)<br>Insomnia (10022437)<br>Irritability (10022998)<br>Sleep disorder (10040984)                                                                                                                                                                                                                                                                             | 1; 0.2 (0.0, 1.2)<br>0; 0.0 (0.0, 0.8)<br>1; 0.2 (0.0, 1.2)<br>1; 0.2 (0.0, 1.2)                                                                                                                                                                           | 0; 0.0 (0.0, 0.8)<br>1; 0.2 (0.0, 1.2)<br>1; 0.2 (0.0, 1.2)<br>0; 0.0 (0.0, 0.8)                                                                                                                                                                          |
| Reproductive system and breast disorders (10038604)<br>Balanoposthitis (10004078)                                                                                                                                                                                                                                                                                                                                 | 2; 0.4 (0.1, 1.5)                                                                                                                                                                                                                                          | 0; 0.0 (0.0, 0.8)                                                                                                                                                                                                                                         |
| Respiratory, thoracic and mediastinal disorders (10038738)<br>Allergic bronchitis (10052613)<br>Allergic cough (10053779)<br>Asthma (10003553)<br>Asthmatic crisis (10064823)<br>Atelectasis (10003598)<br>Bronchial hyperreactivity (10066091)<br>Bronchospasm (10006482)<br>Cough (10011224)<br>Epistaxis (10015090)<br>Oropharyngeal pain (10068319)<br>Rhinitis allergic (10039085)<br>Rhinorrhoea (10039101) | 1; 0.2 (0.0, 1.2)<br>0; 0.0 (0.0, 0.8)<br>4; 0.9 (0.2, 2.2)<br>1; 0.2 (0.0, 1.2)<br>0; 0.0 (0.0, 0.8)<br>5; 1.1 (0.3, 2.5)<br>11; 2.4 (1.2, 4.2)<br>11; 2.4 (1.2, 4.2)<br>0; 0.0 (0.0, 0.8)<br>1; 0.2 (0.0, 1.2)<br>0; 0.0 (0.0, 0.8)<br>3; 0.6 (0.1, 1.9) | 0; 0.0 (0.0, 0.8)<br>2; 0.4 (0.1, 1.5)<br>3; 0.6 (0.1, 1.8)<br>0; 0.0 (0.0, 0.8)<br>1; 0.2 (0.0, 1.2)<br>7; 1.5 (0.6, 3.0)<br>9; 1.9 (0.9, 3.6)<br>14; 3.0 (1.6, 4.9)<br>1; 0.2 (0.0, 1.2)<br>1; 0.2 (0.0, 1.2)<br>1; 0.2 (0.0, 1.2)<br>1; 0.2 (0.0, 1.2) |
| Skin and subcutaneous tissue disorders (10040785)<br>Dermatitis (10012431)<br>Dermatitis allergic (10012434)<br>Dermatitis atopic (10012438)<br>Dermatitis diaper (10012444)<br>Dry skin (10013786)<br>Eczema (10014184)<br>Idiopathic urticaria (10021247)<br>Nail dystrophy (10028698)<br>Neurodermatitis (10029263)<br>Rash (10037844)                                                                         | 4; 0.9 (0.2, 2.2)<br>2; 0.4 (0.1, 1.5)<br>0; 0.0 (0.0, 0.8)<br>7; 1.5 (0.6, 3.1)<br>1; 0.2 (0.0, 1.2)<br>6; 1.3 (0.5, 2.8)<br>0; 0.0 (0.0, 0.8)<br>0; 0.0 (0.0, 0.8)<br>1; 0.2 (0.0, 1.2)<br>2; 0.4 (0.1, 1.5)                                             | 1; 0.2 (0.0, 1.2)<br>1; 0.2 (0.0, 1.2)<br>2; 0.4 (0.1, 1.5)<br>3; 0.6 (0.1, 1.8)<br>0; 0.0 (0.0, 0.8)<br>4; 0.8 (0.2, 2.1)<br>1; 0.2 (0.0, 1.2)<br>1; 0.2 (0.0, 1.2)<br>0; 0.0 (0.0, 0.8)<br>7; 1.5 (0.6, 3.0)                                            |

|                                                                                                                                                                                                                                                                                                                                                                                                                                                                                                                                                                                                    |                                                                                                                                                                                                                                                                                                                                                                                                             |                                                                                                                                                                                                                                                                                                                                                                                                             |
|----------------------------------------------------------------------------------------------------------------------------------------------------------------------------------------------------------------------------------------------------------------------------------------------------------------------------------------------------------------------------------------------------------------------------------------------------------------------------------------------------------------------------------------------------------------------------------------------------|-------------------------------------------------------------------------------------------------------------------------------------------------------------------------------------------------------------------------------------------------------------------------------------------------------------------------------------------------------------------------------------------------------------|-------------------------------------------------------------------------------------------------------------------------------------------------------------------------------------------------------------------------------------------------------------------------------------------------------------------------------------------------------------------------------------------------------------|
| Skin fissures (10040849)<br>Skin hyperpigmentation (10040865)<br>Urticaria (10046735)                                                                                                                                                                                                                                                                                                                                                                                                                                                                                                              | 1; 0.2 (0.0, 1.2)<br>0; 0.0 (0.0, 0.8)<br>2; 0.4 (0.1, 1.5)                                                                                                                                                                                                                                                                                                                                                 | 0; 0.0 (0.0, 0.8)<br>1; 0.2 (0.0, 1.2)<br>1; 0.2 (0.0, 1.2)                                                                                                                                                                                                                                                                                                                                                 |
|                                                                                                                                                                                                                                                                                                                                                                                                                                                                                                                                                                                                    | <b>Infants<br/>IIV4-I<br/>N=410<br/>n; % (95% CI)</b>                                                                                                                                                                                                                                                                                                                                                       | <b>Infants<br/>IIV4<br/>N=411<br/>n; % (95% CI)</b>                                                                                                                                                                                                                                                                                                                                                         |
| At least one symptom                                                                                                                                                                                                                                                                                                                                                                                                                                                                                                                                                                               | 59; 14.4 (11.1, 18.2)                                                                                                                                                                                                                                                                                                                                                                                       | 52; 12.7 (9.6, 16.3)                                                                                                                                                                                                                                                                                                                                                                                        |
| Blood and lymphatic system disorders (10005329)<br>Lymphadenitis (10025188)<br>Lymphadenopathy (10025197)                                                                                                                                                                                                                                                                                                                                                                                                                                                                                          | 1; 0.2 (0.0, 1.4)<br>1; 0.2 (0.0, 1.4)                                                                                                                                                                                                                                                                                                                                                                      | 0; 0.0 (0.0, 0.9)<br>0; 0.0 (0.0, 0.9)                                                                                                                                                                                                                                                                                                                                                                      |
| Ear and labyrinth disorders (10013993)<br>Otorrhoea (10033101)                                                                                                                                                                                                                                                                                                                                                                                                                                                                                                                                     | 0; 0.0 (0.0, 0.9)                                                                                                                                                                                                                                                                                                                                                                                           | 1; 0.2 (0.0, 1.3)                                                                                                                                                                                                                                                                                                                                                                                           |
| Gastrointestinal disorders (10017947)<br>Abdominal pain (10000081)<br>Constipation (10010774)<br>Inguinal hernia (10022016)<br>Oral pain (10031009)<br>Stomatitis (10042128)<br>Vomiting (10047700)                                                                                                                                                                                                                                                                                                                                                                                                | 2; 0.5 (0.1, 1.8)<br>1; 0.2 (0.0, 1.4)<br>0; 0.0 (0.0, 0.9)<br>0; 0.0 (0.0, 0.9)<br>0; 0.0 (0.0, 0.9)<br>2; 0.5 (0.1, 1.8)                                                                                                                                                                                                                                                                                  | 0; 0.0 (0.0, 0.9)<br>1; 0.2 (0.0, 1.3)<br>1; 0.2 (0.0, 1.3)<br>1; 0.2 (0.0, 1.3)<br>1; 0.2 (0.0, 1.3)<br>0; 0.0 (0.0, 0.9)                                                                                                                                                                                                                                                                                  |
| General disorders and administration site conditions (10018065)<br>Chest pain (10008479)<br>Pyrexia (10037660)                                                                                                                                                                                                                                                                                                                                                                                                                                                                                     | 0; 0.0 (0.0, 0.9)<br>1; 0.2 (0.0, 1.4)                                                                                                                                                                                                                                                                                                                                                                      | 1; 0.2 (0.0, 1.3)<br>1; 0.2 (0.0, 1.3)                                                                                                                                                                                                                                                                                                                                                                      |
| Immune system disorders (10021428)<br>Food allergy (10016946)<br>Milk allergy (10027633)                                                                                                                                                                                                                                                                                                                                                                                                                                                                                                           | 0; 0.0 (0.0, 0.9)<br>0; 0.0 (0.0, 0.9)                                                                                                                                                                                                                                                                                                                                                                      | 1; 0.2 (0.0, 1.3)<br>1; 0.2 (0.0, 1.3)                                                                                                                                                                                                                                                                                                                                                                      |
| Infections and infestations (10021881)<br>Acute tonsillitis (10001093)<br>Bronchitis (10006451)<br>Bronchopneumonia (10006469)<br>Cellulitis (10007882)<br>Conjunctivitis (10010741)<br>Cystitis (10011781)<br>Ear infection (10014011)<br>Enterovirus infection (10014909)<br>Gastroenteritis (10017888)<br>Herpangina (10019936)<br>Herpes simplex (10019948)<br>Impetigo (10021531)<br>Laryngitis (10023874)<br>Meningitis viral (10027260)<br>Molluscum contagiosum (10027807)<br>Nasopharyngitis (10028810)<br>Oral herpes (10067152)<br>Otitis externa (10033072)<br>Otitis media (10033078) | 1; 0.2 (0.0, 1.4)<br>7; 1.7 (0.7, 3.5)<br>1; 0.2 (0.0, 1.4)<br>7; 1.7 (0.7, 3.5)<br>1; 0.2 (0.0, 1.4)<br>0; 0.0 (0.0, 0.9)<br>1; 0.2 (0.0, 1.4)<br>0; 0.0 (0.0, 0.9)<br>0; 0.0 (0.0, 0.9)<br>1; 0.2 (0.0, 1.4)<br>1; 0.2 (0.0, 1.4)<br>1; 0.2 (0.0, 1.4)<br>0; 0.0 (0.0, 0.9)<br>1; 0.2 (0.0, 1.4)<br>2; 0.5 (0.1, 1.8)<br>2; 0.5 (0.1, 1.8)<br>0; 0.0 (0.0, 0.9)<br>1; 0.2 (0.0, 1.4)<br>2; 0.5 (0.1, 1.8) | 1; 0.2 (0.0, 1.3)<br>4; 1.0 (0.3, 2.5)<br>0; 0.0 (0.0, 0.9)<br>4; 1.0 (0.3, 2.5)<br>0; 0.0 (0.0, 0.9)<br>1; 0.2 (0.0, 1.3)<br>0; 0.0 (0.0, 0.9)<br>1; 0.2 (0.0, 1.3)<br>3; 0.7 (0.2, 2.1)<br>0; 0.0 (0.0, 0.9)<br>0; 0.0 (0.0, 0.9)<br>5; 1.2 (0.4, 2.8)<br>1; 0.2 (0.0, 1.3)<br>1; 0.2 (0.0, 1.3)<br>0; 0.0 (0.0, 0.9)<br>2; 0.5 (0.1, 1.7)<br>2; 0.5 (0.1, 1.7)<br>0; 0.0 (0.0, 0.9)<br>1; 0.2 (0.0, 1.3) |

|                                                            |                   |                   |
|------------------------------------------------------------|-------------------|-------------------|
| Otitis media acute (10033079)                              | 2; 0.5 (0.1, 1.8) | 1; 0.2 (0.0, 1.3) |
| Paronychia (10034016)                                      | 1; 0.2 (0.0, 1.4) | 0; 0.0 (0.0, 0.9) |
| Periporitis staphylogenes (10064163)                       | 1; 0.2 (0.0, 1.4) | 0; 0.0 (0.0, 0.9) |
| Pertussis (10034738)                                       | 1; 0.2 (0.0, 1.4) | 0; 0.0 (0.0, 0.9) |
| Pharyngitis (10034835)                                     | 6; 1.5 (0.5, 3.2) | 4; 1.0 (0.3, 2.5) |
| Pharyngitis streptococcal (10034839)                       | 2; 0.5 (0.1, 1.8) | 0; 0.0 (0.0, 0.9) |
| Pharyngotonsillitis (10049140)                             | 2; 0.5 (0.1, 1.8) | 2; 0.5 (0.1, 1.7) |
| Pseudocroup (10050187)                                     | 1; 0.2 (0.0, 1.4) | 0; 0.0 (0.0, 0.9) |
| Respiratory tract infection (10062352)                     | 0; 0.0 (0.0, 0.9) | 1; 0.2 (0.0, 1.3) |
| Rhinitis (10039083)                                        | 1; 0.2 (0.0, 1.4) | 5; 1.2 (0.4, 2.8) |
| Scarlet fever (10039587)                                   | 0; 0.0 (0.0, 0.9) | 1; 0.2 (0.0, 1.3) |
| Sinusitis (10040753)                                       | 1; 0.2 (0.0, 1.4) | 2; 0.5 (0.1, 1.7) |
| Tonsillitis (10044008)                                     | 3; 0.7 (0.2, 2.1) | 2; 0.5 (0.1, 1.7) |
| Tooth abscess (10044016)                                   | 1; 0.2 (0.0, 1.4) | 0; 0.0 (0.0, 0.9) |
| Tracheitis (10044302)                                      | 2; 0.5 (0.1, 1.8) | 2; 0.5 (0.1, 1.7) |
| Upper respiratory tract infection (10046306)               | 4; 1.0 (0.3, 2.5) | 8; 1.9 (0.8, 3.8) |
| Viral diarrhoea (10051511)                                 | 0; 0.0 (0.0, 0.9) | 1; 0.2 (0.0, 1.3) |
| Viral infection (10047461)                                 | 3; 0.7 (0.2, 2.1) | 0; 0.0 (0.0, 0.9) |
| Vulvitis (10047780)                                        | 1; 0.2 (0.0, 1.4) | 0; 0.0 (0.0, 0.9) |
| Injury, poisoning and procedural complications (10022117)  |                   |                   |
| Arthropod bite (10003399)                                  | 1; 0.2 (0.0, 1.4) | 1; 0.2 (0.0, 1.3) |
| Contusion (10050584)                                       | 1; 0.2 (0.0, 1.4) | 1; 0.2 (0.0, 1.3) |
| Head injury (10019196)                                     | 0; 0.0 (0.0, 0.9) | 1; 0.2 (0.0, 1.3) |
| Joint injury (10060820)                                    | 1; 0.2 (0.0, 1.4) | 0; 0.0 (0.0, 0.9) |
| Laceration (10023572)                                      | 1; 0.2 (0.0, 1.4) | 1; 0.2 (0.0, 1.3) |
| Ligament sprain (10024453)                                 | 0; 0.0 (0.0, 0.9) | 1; 0.2 (0.0, 1.3) |
| Wound (10052428)                                           | 1; 0.2 (0.0, 1.4) | 0; 0.0 (0.0, 0.9) |
| Musculoskeletal and connective tissue disorders (10028395) |                   |                   |
| Neck pain (10028836)                                       | 1; 0.2 (0.0, 1.4) | 0; 0.0 (0.0, 0.9) |
| Neoplasms benign, malignant and unspecified (10029104)     |                   |                   |
| Skin papilloma (10040907)                                  | 1; 0.2 (0.0, 1.4) | 0; 0.0 (0.0, 0.9) |
| Nervous system disorders (10029205)                        |                   |                   |
| Headache (10019211)                                        | 0; 0.0 (0.0, 0.9) | 1; 0.2 (0.0, 1.3) |
| Syncope (10042772)                                         | 1; 0.2 (0.0, 1.4) | 1; 0.2 (0.0, 1.3) |
| Renal and urinary disorders (10038359)                     |                   |                   |
| Enuresis (10014928)                                        | 1; 0.2 (0.0, 1.4) | 0; 0.0 (0.0, 0.9) |
| Respiratory, thoracic and mediastinal disorders (10038738) |                   |                   |
| Bronchial hyperreactivity (10066091)                       | 1; 0.2 (0.0, 1.4) | 1; 0.2 (0.0, 1.3) |
| Bronchospasm (10006482)                                    | 0; 0.0 (0.0, 0.9) | 1; 0.2 (0.0, 1.3) |
| Cough (10011224)                                           | 4; 1.0 (0.3, 2.5) | 4; 1.0 (0.3, 2.5) |
| Dyspnoea (10013968)                                        | 1; 0.2 (0.0, 1.4) | 0; 0.0 (0.0, 0.9) |
| Oropharyngeal pain (10068319)                              | 0; 0.0 (0.0, 0.9) | 2; 0.5 (0.1, 1.7) |
| Tonsillar hypertrophy (10044003)                           | 0; 0.0 (0.0, 0.9) | 1; 0.2 (0.0, 1.3) |
| Skin and subcutaneous tissue disorders (10040785)          |                   |                   |
| Dermatitis (10012431)                                      | 1; 0.2 (0.0, 1.4) | 2; 0.5 (0.1, 1.7) |
| Dry skin (10013786)                                        | 1; 0.2 (0.0, 1.4) | 0; 0.0 (0.0, 0.9) |
| Eczema (10014184)                                          | 1; 0.2 (0.0, 1.4) | 0; 0.0 (0.0, 0.9) |

IIV4-I, quadrivalent inactivated influenza vaccine manufacturing by investigational process; IIV4, licensed quadrivalent inactivated influenza vaccine; MAE, medically-attended adverse event; †including the allowed visit interval of up to 23 days post-vaccination for the adults and up to 42 days post-last vaccination for the children; N, number of subjects with  $\geq 1$  vaccine dose; n, number of participants reporting the MAE; CI, confidence interval
